# Supplementary material
Source: PubMed Central journal article supplement (PMC4625679)
Supplement: ASN.2014101017_ASN2014101017SupplementaryData1.pdf [file ASN.2014101017_ASN2014101017SupplementaryData1.pdf]

**Supplemental Table 1. Countries listed by region providing universal maintenance dialysis access in 2010**

| <b>Region</b>          | <b>Country</b>     |
|------------------------|--------------------|
| <b>Asia Pacific</b>    | Brunei Darussalam  |
|                        | Korea, Republic of |
|                        | Japan              |
| <b>Europe, Western</b> | Austria            |
|                        | Denmark            |
|                        | Finland            |
|                        | France             |
|                        | Germany            |
|                        | Greece             |
|                        | Iceland            |
|                        | Ireland            |
|                        | Israel             |
|                        | Italy              |
|                        | Luxembourg         |
|                        | Netherlands        |
|                        | Norway             |
|                        | Portugal           |
|                        | Spain              |
|                        | Sweden             |
|                        | Switzerland        |
| United Kingdom         |                    |
| <b>Australasia</b>     | Australia          |
|                        | New Zealand        |
| <b>North America</b>   | Canada             |
|                        | United States      |

|                                 |                                            |
|---------------------------------|--------------------------------------------|
| <b>Europe, Central</b>          | Bosnia and Herzegovina                     |
|                                 | Bulgaria                                   |
|                                 | Croatia                                    |
|                                 | Czech Republic                             |
|                                 | Hungary                                    |
|                                 | Macedonia, the Former Yugoslav Republic of |
|                                 | Poland                                     |
|                                 | Romania                                    |
|                                 | Serbia                                     |
|                                 | Slovakia                                   |
|                                 | Slovenia                                   |
| <b>Latin America, Southern</b>  | Argentina                                  |
|                                 | Chile                                      |
|                                 | Uruguay                                    |
| <b>Europe, Eastern</b>          | Belarus                                    |
| <b>Asia, East</b>               | Taiwan                                     |
| <b>Latin America, Tropical</b>  | Brazil                                     |
| <b>Latin America, Central</b>   | Costa Rica                                 |
|                                 | Guatemala                                  |
|                                 | Venezuela                                  |
| <b>Asia, Southeast</b>          | Philippines                                |
|                                 | Thailand                                   |
| <b>North Africa/Middle East</b> | Bahrain                                    |
|                                 | Iran, Islamic Republic of                  |
|                                 | Jordan                                     |
|                                 | Kuwait                                     |
|                                 | Lebanon                                    |
|                                 | Libyan Arab Jamahiriya                     |

|                                 |                                |
|---------------------------------|--------------------------------|
|                                 | Occupied Palestinian Territory |
|                                 | Oman                           |
|                                 | Qatar                          |
|                                 | Saudi Arabia                   |
|                                 | Syrian Arab Republic           |
|                                 | Tunisia                        |
|                                 | Turkey                         |
|                                 | United Arab Emirates           |
|                                 | Yemen                          |
| <b>Caribbean</b>                | Cuba                           |
| <b>Sub-Saharan Africa, East</b> | Seychelles                     |

Literature and internet search performed during July-August 2013 to create this table.

Each of the 187 countries was searched by name in combination with “dialysis” “end-stage renal disease” “renal replacement therapy” “history of dialysis” using PubMed. If there were no PubMed article located, a general internet search using the same search terms was used. Only English hits were examined.
